# Supplementary material for: Effects of habitat factors on the plant diversity on naturally-restored wind farm slopes
Source: PeerJ. 2023 Mar 1;11:e14912. doi: 10.7717/peerj.14912 (PMC9985415; doi:10.7717/peerj.14912)
Supplement: Data S1 [file peerj-11-14912-s001.xlsx]

## Sheet: Raw data
County/ district	Wind farm	Slope number	Position	Aspect	Gradient (°)	Elevation (m)	Years since reatoration (a)	Plant species	Number of plant
Dongbao	Xianghe mountain	S1	Lower	Sunny	40	478	2	Lindera gauca	2
								Pyracantha fortuneana	3
								Lonicera japonica	4
		S2	Lower	Semi-sunny	35	395	2	Lindera gauca	1
								Pyracantha fortuneana	4
								Smilax glabra	2
								Semiaquilegia adoxoides	4
								Allium macrostemon	12
								Acer cordatum	2
								Lonicera japonica	3
		S3	Lower	Semi-sunny	35	400	2	Eleusine indica	40
								Cynodon dactylon	45
								Imperata cylindrica	6
								Lindera gauca	3
								Ilex chinensis	1
		S4	Upper	Semi-sunny	43	416	2	Setaria viridis	30
								Ligustrum lucidum	5
								Lindera gauca	3
								Pinus masoniana	2
								Platycarya strobilacea	2
		S5	Middle	Semi-sunny	50	395	2	Lindera gauca	1
								Pinus masoniana	1
								Zanthoxylum bungeanum	2
								Nandina domestica	1
								Rhododendron simsii	1
								Imperata cylindrica	6
								Cynodon dactylon	38
								Setaria viridis	22
Dawu	Jiangjia mountain	S6	Lower	Sunny	35	413	4	Cynodon dactylon	35
								Phytolacca acinosa	3
								Miscanthus sinensis	2
								Lolium perenne	15
								Pinus masoniana	1
								Artemisia apiacec	3
								Rosa multiflora	1
		S7	Lower	Sunny	68	413	4	Cynodon dactylon	30
								Setaria viridis	15
								Miscanthus sinensis	3
								Artemisia apiacec	20
								Pinus masoniana	2
								Rumex acetosa	30
								Dicranopteris dichotoma	1
								Nerium indicum	1
								Aleurites fordii	1
								Phytolacca acinosa	4
Tongshan	Damu mountain	S8	Lower	Sunny	30	793	1	Erigeron canadensis	30
								Gelsemium elegans	15
								Allium macrostemon	35
								Rubus lambertianus	60
								Lindera gauca	3
								Cunninghamia laceolata	1
								Hypolepis punctata	2
		S9	Lower	Sunny	23	920	1	Rubus lambertianus	60
								Hypolepis punctata	5
								Castanea mollissima	1
								Allium macrostemon	9
								Rubus hirsutus	7
								Cunninghamia laceolata	1
								Lindera gauca	2
								Bolbitis cadieri	5
		S10	Upper	Sunny	30	920	1	Rubus lambertianus	75
								Ophiopogon bodinieri	4
								Miscanthus sinensis	5
								Bolbitis cadieri	5
								Lindera gauca	3
Sui	Fengming mountain	S11	Lower	Semi-sunny	52	634	6	Artemisia argyi	20
								Erigeron canadensis	10
								Elsholtzia ciliata	8
								Lindera gauca	3
								Imperata cylindrica	19
								Setaria viridis	30
								Cynodon dactylon	18
								Erigeron canadensis	5
								Photinia scrrulata	2
								Platycarya strobilacea	1
		S12	Middle	Shady	40	578	4	Cynodon dactylon	20
								Bidens bipinnata	12
								Artemisia argyi	8
		S13	Lower	Shady	57	544	6	Erigeron canadensis	6
								Setaria viridis	30
								Ophiopogon bodinieri	25
								Pyracantha fortuneana	3
								Camellia japonica	3
								Lindera gauca	3
								Ulmus pumila	3
		S14	Lower	Shady	56	770	6	Sabina chinensis	5
								Cynodon dactylon	20
								Lindera gauca	2
								Imperata cylindrica	5
								Acer mairei	1
								Rhus Chinensis	3
								Photinia scrrulata	4
								Cunninghamia laceolata	4
		S15	Lower	Semi-shady	45	431	6	Camellia japonica	3
								Imperata cylindrica	3
								Lindera gauca	1
								Platycarya strobilacea	1
								Themeda triandra	6
								Setaria viridis	35
								Pinus masoniana	1
								Arthraxon hispidus	7
								Elsholtzia ciliata	8
								Bidens bipinnata	7
								Artemisia argyi	2
								Miscanthus sinensis	3
		S16	Lower	Semi-shady	40	520	6	Juncus effusus	22
								Imperata cylindrica	8
								Cynodon dactylon	36
								Erigeron canadensis	17
								Ophiopogon bodinieri	13
								Lindera gauca	2
Dawu	Wuyue mountain	S17	Lower	Semi-sunny	30	625	5	Phytolacca acinosa	15
								Lindera gauca	3
								Rumex acetosa	25
								Semiaquilegia adoxoides	80
								Veronica didyma	60
								Solanum rostratum	1
		S18	Lower	Semi-sunny	75	609	5	Lindera gauca	1
								Imperata cylindrica	60
								Imperata cylindrica	100
								Chrysanthemum indicum	60
								Erigeron canadensis	5
								Ophiopogon bodinieri	3
								Elsholtzia ciliata	100
								Senecio scandens	3
								Daucus carota	3
		S19	Upper	Semi-shady	60	678	5	Elsholtzia ciliata	36
								Erigeron canadensis	4
								Erigeron canadensis	15
		S20	Lower	Semi-shady	20	447	5	Lonicera japonica	5
								Chloris virgata	2
								Sporobolus fertilis	8
								Setaria viridis	6
								Hypolepis punctata	2
								Lindera gauca	1
								Miscanthus sinensis	1
								Lespedeza bicolor	1
								Rosa multiflora	1
								Artemisia apiacec	2
								Erigeron canadensis	3
								Elsholtzia ciliata	1
								Rubus coreanus	3
								Arthraxon hispidus	20
		S21	Middle	Sunny	18	625	5	Cynodon dactylon	100
								Rumex acetosa	28
								Elsholtzia ciliata	100
								Lindera gauca	1
								Eleusine indica	1
								Erigeron canadensis	15

## Sheet: Table 1
Life-form	Species	Family	Genus	Relative Frequency %	Relative Abundance %
Herb	Cynodon dactylon	Gramineae	Cynodon	42.86	38.82
Herb	Erigeron canadensis	Compositae	Erigeron	42.86	8.81
Herb	Imperata cylindrica	Gramineae	Imperata	38.1	12.74
Herb	Setaria viridis	Gramineae	Setaria	33.33	34.16
Herb	Elsholtzia ciliata	Labiatae	Elsholtzia	28.57	25.84
Herb	Miscanthus sinensis	Gramineae	Miscanthus	23.81	3.16
Herb	Ophiopogon bodinieri	Liliaceae	Ophiopogon	19.05	13.19
Herb	Allium macrostemon	Liliaceae	Allium	14.29	25.61
Herb	Arthraxon hispidus	Gramineae	Arthraxon	14.29	22.4
Herb	Rumex acetosa	Polygonaceae	Rumex	14.29	17.68
Herb	Artemisia argyi	Compositae	Artemisia	14.29	13.28
Herb	Artemisia apiacec	Compositae	Artemisia	14.29	8.36
Herb	Phytolacca acinosa	Phytolaccaceae	Phytolacca	14.29	4.9
Herb	Bolbitis cadieri	Pteridiaceae	Bolbitis	14.29	4.53
Herb	Semiaquilegia adoxoides	Ranunculaceae	Semiaquilegia	9.52	28.88
Herb	Eleusine indica	Gramineae	Eleusine	9.52	21.26
Herb	Bidens bipinnata	Compositae	Bidens	9.52	19.55
Herb	Hypolepis punctata	Pteridiaceae	Hypolepis	9.52	3.46
Herb	Veronica didyma	Scrophulariaceae	Veronica	4.76	32.61
Herb	Juncus effusus	Juncaceae	Juncus	4.76	22.45
Herb	Chrysanthemum indicum	Compositae	Chrysanthemum	4.76	17.8
Herb	Sporobolus fertilis	Gramineae	Sporobolus	4.76	14.29
Herb	Lolium perenne	Gramineae	Lolium	4.76	14.02
Herb	Gelsemium elegans	Loganiaceae	Gelsemium	4.76	10.27
Herb	Daucus carota	Umbelliferae	Daucus	4.76	9.35
Herb	Themeda triandra	Gramineae	Themeda	4.76	7.79
Herb	Chloris virgata	Gramineae	Chloris	4.76	3.57
Herb	Dicranopteris dichotoma	Gleicheniaceae	Dicranopteris	4.76	0.93
Herb	Senecio scandens	Compositae	Senecio	4.76	0.89
Herb	Solanum rostratum	Solanaceae	Solanum	4.76	0.54
Shrub	Pyracantha fortuneana	Rosaceae	Pyracantha	14.29	17.24
Shrub	Lonicera japonica	Caprifoliaceae	Lonicera	14.29	21.36
Shrub	Rubus lambertianus	Rosaceae	Rubus	14.29	63.09
Shrub	Camellia japonica	Theaceae	Camellia	9.52	4
Shrub	Rosa multiflora	Rosaceae	Rosa	9.52	1.36
Shrub	Smilax glabra	Liliaceae	Smilax	4.76	7.14
Shrub	Ligustrum lucidum	Oleaceae	Ligustrum	4.76	11.9
Shrub	Rubus hirsutus	Rosaceae	Rubus	4.76	7.78
Shrub	Acer cordatum	Aceraceae	Acer	4.76	7.14
Shrub	Rubus coreanus	Rosaceae	Rubus	4.76	5.36
Shrub	Lespedeza bicolor	Leguminosae	Lespedeza	4.76	1.79
Shrub	Rhododendron simsii	Ericaceae	Rhododendron	4.76	1.39
Shrub	Nandina domestica	Berberidaceae	Nandina	4.76	1.39
Shrub	Nerium indicum	Apocynaceae	Nerium	4.76	0.93
Tree	Lindera gauca	Lauraceae	Lindera	80.95	3.01
Tree	Pinus masoniana	Pinaceae	Pinus	33.33	1.72
Tree	Platycarya strobilacea	Juglandaceae	Platycarya	14.29	2.31
Tree	Photinia scrrulata	Rosaceae	Photinia	9.52	5.41
Tree	Sabina chinensis	Cupressaceae	Juniperus	4.76	11.36
Tree	Cunninghamia laceolata	Taxodiaceae	Cunninghamia	4.76	9.09
Tree	Rhus Chinensis	Anacardiaceae	Rhus	4.76	6.82
Tree	Ulmus pumila	Ulmaceae	Ulmus	4.76	4.11
Tree	Zanthoxylum bungeanum	Rutaceae	Zanthoxylum	4.76	2.78
Tree	Acer mairei	Juglandaceae	Pterocarya	4.76	2.27
Tree	Castanea mollissima	Fagaceae	Castanea	4.76	1.11
Tree	Ilex chinensis	Aquifoliaceae	Ilex	4.76	1.05
Tree	Aleurites fordii	Euphorbiaceae	Vernicia	4.76	0.93

## Sheet: Table 2
Slope number	X1 (Position)	X2 (Aspect)	X3 (Gradient)	X4 (Elevation)	X5 (Years since restoration)	H'	J	R		Diversity indexes	Regression model	R2	F	P
S1	Lower	Sunny	40	478	2	1.06086	0.965634	0.910239		H'	Y = 0.204 + 0.343X1 + 0.128X2	0.564	11.66	<0.001
S2	Lower	Semi-sunny	35	395	2	1.65443	0.850209	1.80061		J	Y = 0.441 + 0.051X1 + 0.068X2	0.315	4.138	<0.05
S3	Lower	Semi-sunny	35	400	2	1.04965	0.652185	0.878372		R	Y = 0.299 + 0.442X1	0.247	6.217	<0.05
S4	Upper	Semi-sunny	43	416	2	0.972157	0.604035	1.07019
S5	Middle	Semi-sunny	50	395	2	1.24378	0.59813	1.63679
S6	Lower	Sunny	35	413	4	1.21041	0.622029	1.46544
S7	Lower	Sunny	68	413	4	1.73045	0.751525	1.92603
S8	Lower	Sunny	30	793	1	1.43952	0.739767	1.20395
S9	Lower	Sunny	23	920	1	1.20495	0.579456	1.55562
S10	Upper	Sunny	30	920	1	0.73106	0.454233	0.884606
S11	Lower	Semi-sunny	52	634	6	1.97504	0.857747	1.89331
S12	Middle	Shady	40	578	4	1.02965	0.937231	0.54217
S13	Lower	Shady	57	544	6	1.46249	0.751572	1.39845
S14	Lower	Shady	56	770	6	1.69825	0.816684	1.8498
S15	Lower	Semi-shady	45	431	6	1.87186	0.753292	2.53234
S16	Lower	Semi-shady	40	520	6	1.55904	0.87012	1.09052
S17	Lower	Semi-sunny	30	625	5	1.29857	0.724746	0.958785
S18	Lower	Semi-sunny	75	609	5	1.54461	0.702981	1.37596
S19	Upper	Semi-shady	60	678	5	0.822377	0.748559	0.499085
S20	Lower	Semi-shady	20	447	5	2.13074	0.807385	3.22953
S21	Middle	Sunny	18	625	5	1.19531	0.667117	0.908883

## Sheet: Figure 1
Wind farm	Slope number	Position	Aspect	Gradient(°)	Elevation(m)	Years since restoration
Xianghe mountain	1	Lower	Sunny	40	478	2
	2	Lower	Semi-sunny	35	395	2
	3	Lower	Semi-sunny	35	400	2
	4	Upper	Semi-sunny	43	416	2
	5	Middle	Semi-sunny	50	395	2
Jiangjia mountain	6	Lower	Sunny	35	413	4
	7	Lower	Sunny	68	413	4
Damu mountain	8	Lower	Sunny	30	793	1
	9	Lower	Sunny	23	920	1
	10	Upper	Sunny	30	920	1
Fengming mountain	11	Lower	Semi-sunny	52	634	6
	12	Middle	Shady	40	578	4
	13	Lower	Shady	57	544	6
	14	Lower	Shady	56	770	6
	15	Lower	Semi-shady	45	431	6
	16	Lower	Semi-shady	40	520	6
Wuyue mountain	17	Lower	Semi-sunny	30	625	5
	18	Lower	Semi-sunny	75	609	5
	19	Upper	Semi-shady	60	678	5
	20	Lower	Semi-shady	20	447	5
	21	Middle	Sunny	18	625	5

## Sheet: Figure 2
		Number of plant species
		Total	Herb	Shrub	Tree
Position	Upper	12	7	2	3
	Middle	14	9	2	3
	Lower	56	33	11	12
Aspect	Sunny	26	16	6	4
	Semi-sunny	31	18	7	6
	Semi-shady	25	16	5	3
	Shady	16	7	2	4
Slope angle (°)	≤30	30	20	6	3
	30~50	35	18	9	4
Altitude (m)	>50	30	17	3	8
	≤500	39	21	12	6
	500~700	26	20	2	4
	>700	18	9	2	6
Restoration years (a)	1	12	6	2	2
	2	19	6	3	5
	4	14	10	2	3
	5	28	22	4	5
	6	24	12	3	8

## Sheet: Figure 3
			Shannon-Wiener（H'）		Pielou（J）		Margalef（R）
			Ave.	SD.	Ave.	SD.	Ave.	SD.
	Total		1.37549	0.3794	0.73594	0.12608	1.41003	0.65572
	Position	Upper	0.85161	0.17048	0.52913	0.10593	0.9774	0.13122
		Middle	1.21954	0.03427	0.63262	0.04878	1.27284	0.51471
		Lower	1.45546	0.36592	0.77242	0.10453	1.47707	0.6995
	Aspect	Sunny	1.22465	0.30928	0.68282	0.16064	1.26497	0.40056
		Semi-sunny	1.39118	0.35502	0.71286	0.10707	1.37343	0.41455
		Semi-shady	1.596	0.56624	0.79484	0.05684	1.83787	1.26094
		Shady	1.3968	0.3391	0.83516	0.0942	1.26347	0.66418
	Slope angle (°)	≤30	1.33336	0.45752	0.66212	0.12738	1.4569	0.90465
		30~50	1.29465	0.32232	0.76143	0.14798	1.32518	0.6026
		>50	1.53887	0.39283	0.77151	0.05567	1.49044	0.54507
	Altitude (m)	≤500	1.43604	0.41833	0.73382	0.1264	1.71661	0.77826
		500~700	1.36089	0.35688	0.78251	0.09439	1.08339	0.46617
		>700	1.26844	0.41102	0.64754	0.1624	1.37349	0.41944
	Restoration years (a)	1	1.12518	0.3609	0.59115	0.14313	1.21472	0.33564
		2	1.19617	0.27488	0.73404	0.16523	1.25924	0.4296
		4	1.32351	0.36383	0.77026	0.15843	1.31121	0.7047
		5	1.39832	0.48495	0.73016	0.05255	1.39445	1.07181
		6	1.71334	0.21247	0.80988	0.05605	1.75288	0.54795
